# Supplementary material
Source: publisher figshare collection journal article supplement (https://acs.figshare.com/ndownloader/files/3935092)
Supplement: Supplementary file 1 [file 3935092]

data_20130718
_audit_creation_date              2013-10-21
_audit_creation_method
;
  Olex2 1.1
  (compiled 2011.11.01 svn.r2039, GUI svn.r3906)
;
_publ_contact_author_address      ?
_publ_contact_author_email        ?
_publ_contact_author_name         ''
_publ_contact_author_phone        ?
_chemical_formula_moiety          'C10 H7 Br2 N O3 S'
_chemical_formula_sum             'C10 H7 Br2 N O3 S'
_chemical_formula_weight          381.05
loop_
  _atom_type_symbol
  _atom_type_scat_dispersion_real
  _atom_type_scat_dispersion_imag
  _atom_type_scat_source
  _atom_type_scat_dispersion_source
 C 0.00347 0.00161 'International Tables Volume C Table 6.1.1.4 (pp. 500-502)'
 'Henke, Gullikson and Davis, At. Data and Nucl. Data Tables, 1993, 54, 2'
 H 0.00000 0.00000 'International Tables Volume C Table 6.1.1.4 (pp. 500-502)'
 'Henke, Gullikson and Davis, At. Data and Nucl. Data Tables, 1993, 54, 2'
 O 0.01158 0.00611 'International Tables Volume C Table 6.1.1.4 (pp. 500-502)'
 'Henke, Gullikson and Davis, At. Data and Nucl. Data Tables, 1993, 54, 2'
 N 0.00653 0.00323 'International Tables Volume C Table 6.1.1.4 (pp. 500-502)'
 'Henke, Gullikson and Davis, At. Data and Nucl. Data Tables, 1993, 54, 2'
 S 0.12424 0.12443 'International Tables Volume C Table 6.1.1.4 (pp. 500-502)'
 'Henke, Gullikson and Davis, At. Data and Nucl. Data Tables, 1993, 54, 2'
 Br -0.28346 2.55990 'International Tables Volume C Table 6.1.1.4 (pp. 500-502)'
 'Henke, Gullikson and Davis, At. Data and Nucl. Data Tables, 1993, 54, 2'

_space_group_crystal_system       'triclinic'
_space_group_IT_number            2
_space_group_name_H-M_alt         'P -1'
_space_group_name_Hall            '-P 1'
loop_
  _space_group_symop_id
  _space_group_symop_operation_xyz
 1 x,y,z
 2 -x,-y,-z

_cell_length_a                    4.8116(4)
_cell_length_b                    7.3828(7)
_cell_length_c                    18.4439(17)
_cell_angle_alpha                 88.811(7)
_cell_angle_beta                  88.827(7)
_cell_angle_gamma                 74.371(8)
_cell_volume                      630.75(10)
_cell_formula_units_Z             2
_cell_measurement_reflns_used     1514
_cell_measurement_temperature     293.1(2)
_cell_measurement_theta_max       28.9312
_cell_measurement_theta_min       3.0486
_exptl_absorpt_coefficient_mu     6.585
_exptl_absorpt_correction_T_max   1.00000
_exptl_absorpt_correction_T_min   0.32327
_exptl_absorpt_correction_type    multi-scan
_exptl_absorpt_process_details
;
CrysAlisPro, Agilent Technologies,
Version 1.171.36.21 (release 14-08-2012 CrysAlis171 .NET)
(compiled Sep 14 2012,17:21:16)
Empirical absorption correction using spherical harmonics,
 implemented in SCALE3 ABSPACK scaling algorithm.
;
_exptl_crystal_colour             ''
_exptl_crystal_colour_lustre      clear
_exptl_crystal_colour_modifier    light
_exptl_crystal_colour_primary     colourless
_exptl_crystal_density_diffrn     2.0062
_exptl_crystal_description        block
_exptl_crystal_F_000              367.3598
_exptl_crystal_size_max           0.1
_exptl_crystal_size_mid           0.1
_exptl_crystal_size_min           0.1
_diffrn_reflns_av_R_equivalents   0.0618
_diffrn_reflns_av_unetI/netI      0.1007
_diffrn_reflns_limit_h_max        6
_diffrn_reflns_limit_h_min        -6
_diffrn_reflns_limit_k_max        9
_diffrn_reflns_limit_k_min        -5
_diffrn_reflns_limit_l_max        24
_diffrn_reflns_limit_l_min        -24
_diffrn_reflns_number             4582
_diffrn_reflns_theta_full         25
_diffrn_reflns_theta_max          26.50
_diffrn_reflns_theta_min          3.05
_diffrn_ambient_temperature       293.1(2)
_diffrn_detector_area_resol_mean  5.1892
_diffrn_measured_fraction_theta_full 0.9980
_diffrn_measured_fraction_theta_max 0.9843
_diffrn_measurement_details
;
#__ type_ start__ end____ width___ exp.time_
  1 omega  -54.00  -20.00   1.0000   43.5200
omega____ theta____ kappa____ phi______ frames
    -      -16.2147   89.0000   24.0000 34

#__ type_ start__ end____ width___ exp.time_
  2 omega  -85.00   16.00   1.0000   43.5200
omega____ theta____ kappa____ phi______ frames
    -      -16.2147  -77.0000  150.0000 101

#__ type_ start__ end____ width___ exp.time_
  3 omega  -99.00   -9.00   1.0000   43.5200
omega____ theta____ kappa____ phi______ frames
    -      -16.2147  -57.0000  -90.0000 90

#__ type_ start__ end____ width___ exp.time_
  4 omega  -56.00   54.00   1.0000   43.5200
omega____ theta____ kappa____ phi______ frames
    -       16.6835  -37.0000    0.0000 110
;
_diffrn_measurement_device_type   'SuperNova, Dual, Cu at zero, Atlas'
_diffrn_measurement_method        '\w scans'
_diffrn_orient_matrix_UB_11       -0.0300431000
_diffrn_orient_matrix_UB_12       0.0668527000
_diffrn_orient_matrix_UB_13       -0.0289360000
_diffrn_orient_matrix_UB_21       0.0693954000
_diffrn_orient_matrix_UB_22       0.0580209000
_diffrn_orient_matrix_UB_23       0.0187944000
_diffrn_orient_matrix_UB_31       0.1331130000
_diffrn_orient_matrix_UB_32       -0.0460382000
_diffrn_orient_matrix_UB_33       -0.0170124000
_diffrn_radiation_monochromator   mirror
_diffrn_radiation_type            'Mo K\a'
_diffrn_radiation_wavelength      0.7107
_diffrn_source                    'SuperNova (Mo) X-ray Source'
_diffrn_source_current            n/a
_diffrn_source_voltage            n/a
_reflns_Friedel_coverage          0.0
_reflns_limit_h_max               6
_reflns_limit_h_min               -6
_reflns_limit_k_max               9
_reflns_limit_k_min               -9
_reflns_limit_l_max               23
_reflns_limit_l_min               0
_reflns_number_gt                 1750
_reflns_number_total              2578
_reflns_odcompleteness_completeness 99.80
_reflns_odcompleteness_iscentric  1
_reflns_odcompleteness_theta      26.32
_reflns_threshold_expression      I>=2u(I)
_computing_cell_refinement
;
CrysAlisPro, Agilent Technologies,
Version 1.171.36.21 (release 14-08-2012 CrysAlis171 .NET)
(compiled Sep 14 2012,17:21:16)
;
_computing_data_collection
;
CrysAlisPro, Agilent Technologies,
Version 1.171.36.21 (release 14-08-2012 CrysAlis171 .NET)
(compiled Sep 14 2012,17:21:16)
;
_computing_data_reduction
;
CrysAlisPro, Agilent Technologies,
Version 1.171.36.21 (release 14-08-2012 CrysAlis171 .NET)
(compiled Sep 14 2012,17:21:16)
;
_computing_molecular_graphics
;
O. V. Dolomanov, L. J. Bourhis, R. J. Gildea, J. A. K. Howard and H. Puschmann,
OLEX2: a complete structure solution, refinement and analysis program.
J. Appl. Cryst. (2009). 42, 339-341.
;
_computing_publication_material
;
O. V. Dolomanov, L. J. Bourhis, R. J. Gildea, J. A. K. Howard and H. Puschmann,
OLEX2: a complete structure solution, refinement and analysis program.
J. Appl. Cryst. (2009). 42, 339-341.
;
_computing_structure_refinement
;
XL, G.M. Sheldrick, Acta Cryst.
(2008). A64, 112-122
;
_computing_structure_solution
;
SHELXS, G.M. Sheldrick, Acta Cryst.
(2008). A64, 112-122
;
_refine_diff_density_max          1.130470
_refine_diff_density_min          -0.925977
_refine_diff_density_rms          0.241896
_refine_ls_d_res_high             0.796451
_refine_ls_d_res_low              6.668510
_refine_ls_goodness_of_fit_ref    1.035995
_refine_ls_hydrogen_treatment     mixed
_refine_ls_matrix_type            full
_refine_ls_number_constraints     10
_refine_ls_number_parameters      154
_refine_ls_number_reflns          2578
_refine_ls_number_restraints      0
_refine_ls_R_factor_all           0.089988
_refine_ls_R_factor_gt            0.055870
_refine_ls_restrained_S_all       1.035995
_refine_ls_shift/su_max           0.0004
_refine_ls_shift/su_mean          0.0001
_refine_ls_structure_factor_coef  Fsqd
_refine_ls_weighting_details
'w=1/[\s^2^(Fo^2^)+(0.0513P)^2^] where P=(Fo^2^+2Fc^2^)/3'
_refine_ls_weighting_scheme       calc
_refine_ls_wR_factor_ref          0.146153
loop_
  _atom_site_label
  _atom_site_type_symbol
  _atom_site_fract_x
  _atom_site_fract_y
  _atom_site_fract_z
  _atom_site_U_iso_or_equiv
  _atom_site_adp_type
  _atom_site_occupancy
  _atom_site_refinement_flags_posn
 Br1 Br 0.83093(15) 0.80069(10) 0.49158(4) 0.0510(3) Uani 1.000000 .
 Br2 Br 0.30371(15) 0.42641(9) 0.73286(4) 0.0532(3) Uani 1.000000 .
 C1 C 0.675(2) 1.2473(13) 0.9969(4) 0.093(3) Uani 1.000000 .
 H1a H 0.468(2) 1.285(9) 0.9938(5) 0.140(4) Uiso 1.000000 G
 H1b H 0.735(12) 1.126(3) 1.0201(14) 0.140(4) Uiso 1.000000 G
 H1c H 0.737(12) 1.337(7) 1.0248(12) 0.140(4) Uiso 1.000000 G
 C2 C 0.8065(17) 1.2382(11) 0.9215(4) 0.066(2) Uani 1.000000 .
 H2a H 0.7366(17) 1.3591(11) 0.8971(4) 0.080(3) Uiso 1.000000 R
 H2b H 1.0147(17) 1.2108(11) 0.9248(4) 0.080(3) Uiso 1.000000 R
 C3 C 0.7304(14) 1.0890(9) 0.8782(3) 0.0473(17) Uani 1.000000 .
 H3a H 0.7799(14) 0.9716(9) 0.9058(3) 0.057(2) Uiso 1.000000 R
 H3b H 0.5235(14) 1.1241(9) 0.8710(3) 0.057(2) Uiso 1.000000 R
 C4 C 0.8809(14) 1.0580(8) 0.8056(4) 0.0440(16) Uani 1.000000 .
 C5 C 0.8361(13) 0.9584(9) 0.6775(4) 0.0434(16) Uani 1.000000 .
 C6 C 0.7091(12) 0.8100(8) 0.6477(4) 0.0370(14) Uani 1.000000 .
 C7 C 0.5933(12) 0.7233(8) 0.7037(3) 0.0365(14) Uani 1.000000 .
 C8 C 0.6373(13) 0.8033(8) 0.7734(4) 0.0434(16) Uani 1.000000 .
 C9 C 0.6943(14) 0.7390(9) 0.5811(4) 0.0463(16) Uani 1.000000 .
 C10 C 0.4804(13) 0.5847(8) 0.6815(3) 0.0381(14) Uani 1.000000 .
 N1 N 0.7849(11) 0.9448(7) 0.7552(3) 0.0425(13) Uani 1.000000 .
 O1 O 1.0702(10) 1.1271(7) 0.7882(3) 0.0632(14) Uani 1.000000 .
 O2 O 0.5743(11) 0.7627(6) 0.8333(2) 0.0589(14) Uani 1.000000 .
 O3 O 0.9460(10) 1.0644(6) 0.6479(2) 0.0561(13) Uani 1.000000 .
 S1 S 0.5277(4) 0.5602(2) 0.58910(10) 0.0494(5) Uani 1.000000 .

loop_
  _atom_site_aniso_label
  _atom_site_aniso_U_11
  _atom_site_aniso_U_22
  _atom_site_aniso_U_33
  _atom_site_aniso_U_12
  _atom_site_aniso_U_13
  _atom_site_aniso_U_23
 Br1 0.0624(5) 0.0534(5) 0.0381(4) -0.0179(4) 0.0116(3) -0.0014(3)
 Br2 0.0522(5) 0.0474(4) 0.0637(5) -0.0211(3) 0.0082(4) 0.0080(4)
 C1 0.127(8) 0.101(7) 0.051(5) -0.030(6) 0.002(5) -0.023(5)
 C2 0.086(6) 0.065(5) 0.054(5) -0.032(4) 0.009(4) -0.019(4)
 C3 0.063(4) 0.051(4) 0.040(4) -0.035(4) 0.005(3) -0.009(3)
 C4 0.059(4) 0.039(3) 0.040(4) -0.023(3) 0.003(3) -0.003(3)
 C5 0.041(4) 0.048(4) 0.041(4) -0.013(3) 0.007(3) 0.003(3)
 C6 0.037(3) 0.032(3) 0.044(4) -0.013(3) 0.002(3) 0.001(3)
 C7 0.035(3) 0.041(3) 0.033(3) -0.010(3) 0.004(3) 0.004(3)
 C8 0.039(4) 0.037(3) 0.050(4) -0.005(3) 0.010(3) -0.004(3)
 C9 0.049(4) 0.054(4) 0.038(4) -0.017(3) 0.008(3) -0.001(3)
 C10 0.049(4) 0.030(3) 0.039(3) -0.017(3) 0.008(3) 0.000(3)
 N1 0.053(3) 0.042(3) 0.037(3) -0.021(3) 0.010(3) 0.009(2)
 O1 0.070(3) 0.083(4) 0.055(3) -0.053(3) 0.009(3) -0.004(3)
 O2 0.096(4) 0.057(3) 0.036(3) -0.043(3) 0.016(3) -0.003(2)
 O3 0.079(3) 0.060(3) 0.043(3) -0.042(3) 0.019(3) 0.001(2)
 S1 0.0593(11) 0.0495(10) 0.0445(10) -0.0237(9) 0.0059(9) -0.0065(9)

loop_
  _geom_bond_atom_site_label_1
  _geom_bond_atom_site_label_2
  _geom_bond_distance
  _geom_bond_site_symmetry_2
 Br1 C9 1.857(6) .
 Br2 C10 1.855(5) .
 C1 H1a 0.9600 .
 C1 H1b 0.9600 .
 C1 H1c 0.9600 .
 C1 C2 1.512(10) .
 C2 H2a 0.9700 .
 C2 H2b 0.9700 .
 C2 C3 1.500(9) .
 C3 H3a 0.9700 .
 C3 H3b 0.9700 .
 C3 C4 1.502(8) .
 C4 N1 1.425(8) .
 C4 O1 1.193(7) .
 C5 C6 1.508(8) .
 C5 N1 1.456(8) .
 C5 O3 1.176(7) .
 C6 C7 1.389(8) .
 C6 C9 1.357(9) .
 C7 C8 1.468(9) .
 C7 C10 1.355(8) .
 C8 N1 1.443(7) .
 C8 O2 1.194(7) .
 C9 S1 1.721(7) .
 C10 S1 1.722(6) .

loop_
  _geom_angle_atom_site_label_1
  _geom_angle_atom_site_label_2
  _geom_angle_atom_site_label_3
  _geom_angle
  _geom_angle_site_symmetry_1
  _geom_angle_site_symmetry_3
 H1b C1 H1a 109.5 . .
 H1c C1 H1a 109.5 . .
 H1c C1 H1b 109.5 . .
 C2 C1 H1a 109.5 . .
 C2 C1 H1b 109.5 . .
 C2 C1 H1c 109.5 . .
 H2a C2 C1 109.5(5) . .
 H2b C2 C1 109.5(5) . .
 H2b C2 H2a 108.1 . .
 C3 C2 C1 110.7(6) . .
 C3 C2 H2a 109.5(4) . .
 C3 C2 H2b 109.5(4) . .
 H3a C3 C2 108.9(4) . .
 H3b C3 C2 108.9(4) . .
 H3b C3 H3a 107.7 . .
 C4 C3 C2 113.4(5) . .
 C4 C3 H3a 108.9(3) . .
 C4 C3 H3b 108.9(4) . .
 N1 C4 C3 117.6(5) . .
 O1 C4 C3 122.9(6) . .
 O1 C4 N1 119.4(6) . .
 N1 C5 C6 102.8(5) . .
 O3 C5 C6 130.9(6) . .
 O3 C5 N1 126.4(6) . .
 C7 C6 C5 110.1(6) . .
 C9 C6 C5 135.2(6) . .
 C9 C6 C7 114.6(6) . .
 C8 C7 C6 109.8(6) . .
 C10 C7 C6 113.8(6) . .
 C10 C7 C8 136.3(6) . .
 N1 C8 C7 105.1(5) . .
 O2 C8 C7 129.6(6) . .
 O2 C8 N1 125.3(6) . .
 C6 C9 Br1 130.4(5) . .
 S1 C9 Br1 120.6(4) . .
 S1 C9 C6 108.9(5) . .
 C7 C10 Br2 131.4(5) . .
 S1 C10 Br2 119.1(3) . .
 S1 C10 C7 109.5(4) . .
 C5 N1 C4 121.9(5) . .
 C8 N1 C4 125.9(5) . .
 C8 N1 C5 112.2(5) . .
 C10 S1 C9 93.2(3) . .
